# Supplementary material for: Important role of precipitation in controlling a more uniform spring phenology in the Qinba Mountains, China
Source: PubMed Central journal article supplement (PMC9945530; doi:10.3389/fpls.2023.1074405), 2023-02-08
Supplement: DataSheet_1.pdf [file DataSheet_1.pdf]

## Supplementary Materials for

Important role of precipitation in controlling a more uniform spring phenology in the Qinba Mountains, China

Jianhao Li<sup>1</sup>, Jingyun Guan<sup>1,2</sup>, Wangqiang Han<sup>1</sup>, Ruikang Tian<sup>1</sup>, Binbin Lu<sup>3</sup>, Danlin Yu<sup>4</sup>,  
Jianghua Zheng<sup>1\*</sup>

<sup>1</sup> College of Geography and Remote sensing Sciences, Institute of Arid Ecology and Environment, Key Laboratory of Oasis Ecology, Xinjiang University, Urumqi 830046, China

<sup>2</sup> College of Tourism, Xinjiang University of Finance & Economics, Urumqi 830012, China

<sup>3</sup> School of Remote Sensing and Information Engineering, Wuhan University, Wuhan 430079, China

<sup>4</sup> Department of Earth and Environmental Studies, Montclair State University, New Jersey 07043, USA

\* *Corresponding author* :

*Jianghua Zheng*

*College of Geography and Remote sensing Sciences, and Key Laboratory of Oasis Ecology under*

*Ministry of Education Xinjiang University, Urumqi 830046, China*

*Email: zheng.jianghua@xju.edu.cn*

This PDF file includes:

Figs. S1 to S6

Tables S1 to S2

**Table S1.** The slope of SOS along EG in the QB from 2001 to 2018.

| Year | Slope of SOS along EG    | R <sup>2</sup> |
|------|--------------------------|----------------|
| 2001 | S = 0.02038 ± 8.58018E-4 | 0.95***        |
| 2002 | S = 0.01989 ± 7.37398E-4 | 0.96***        |
| 2003 | S = 0.01621 ± 6.35332E-4 | 0.96***        |
| 2004 | S = 0.01974 ± 7.11802E-4 | 0.96***        |
| 2005 | S = 0.01359 ± 4.16969E-4 | 0.97***        |
| 2006 | S = 0.01738 ± 3.81774E-4 | 0.99***        |
| 2007 | S = 0.01698 ± 5.54988E-4 | 0.97***        |
| 2008 | S = 0.01177 ± 4.50813E-4 | 0.96***        |
| 2009 | S = 0.01351 ± 7.45447E-4 | 0.92***        |
| 2010 | S = 0.013 ± 5.94711E-4   | 0.94***        |
| 2011 | S = 0.01245 ± 8.44703E-4 | 0.89***        |
| 2012 | S = 0.01161 ± 5.96086E-4 | 0.93***        |
| 2013 | S = 0.01403 ± 5.14453E-4 | 0.96***        |
| 2014 | S = 0.01637 ± 9.63645E-4 | 0.91***        |
| 2015 | S = 0.01205 ± 0.00103    | 0.82***        |
| 2016 | S = 0.0185 ± 5.73025E-4  | 0.97***        |
| 2017 | S = 0.01746 ± 4.2414E-4  | 0.98***        |
| 2018 | S = 0.01226 ± 6.82392E-4 | 0.91***        |

**Table S2.** Comparison of our results with previous studies in related regions in China.

| Area                                 | SOS/d    | Data form           | Time scale  | Reference         |
|--------------------------------------|----------|---------------------|-------------|-------------------|
| Temperate China                      | 50 - 180 | SPOT                | 1999 - 2009 | Cong et al., 2020 |
| Subtropical China                    | 50 - 140 | SIF                 | 2002 - 2017 | Li et al., 2021   |
| Yangtze River Basin                  | 70 - 160 | GIMMS               | 1982 - 2015 | Yuan et al., 2019 |
| QB Mountains                         | 60 - 110 | AVHRR, MODIS, VIIRS | 1981 - 2016 | Li et al., 2020   |
| Qinling-Huanghuai Plain              | 67 - 116 | MOD09Q1             | 2002 - 2020 | Wang et al., 2022 |
| Qinling Mountains                    | 83 - 121 | MOD13A2             | 2001 - 2019 | Guo et al., 2021  |
| Qinling Mountains                    | 73 - 113 | MOD13Q1             | 2001 - 2018 | Li et al., 2021   |
| Xian station                         | 97       | Ground station      | 1985 - 2015 | Deng et al., 2017 |
| Xingangshan, Jiangxi Province, China | 71 - 113 | Ground station      | 2009 - 2010 | Du et al., 2020   |
| QB mountains                         | 73 - 105 | MOD13Q1             | 2001 - 2018 | This study        |

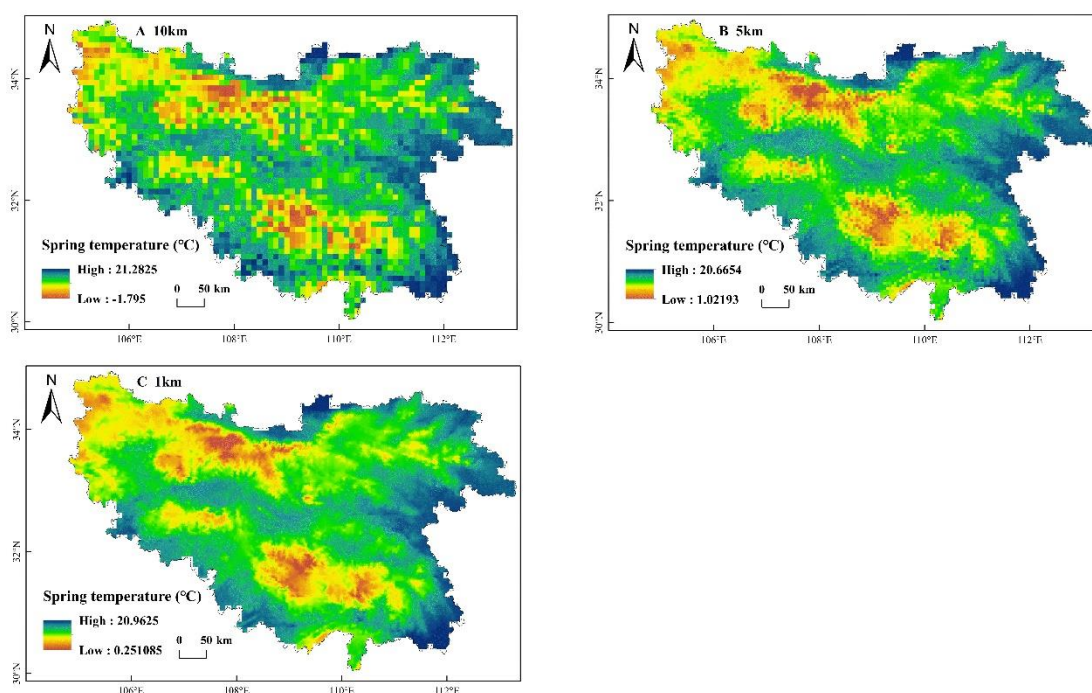

**Fig. S1.** Spatial downscaling of climate data using geographically weighted regression in three levels.

The spring temperature of 2001 was used as an example.

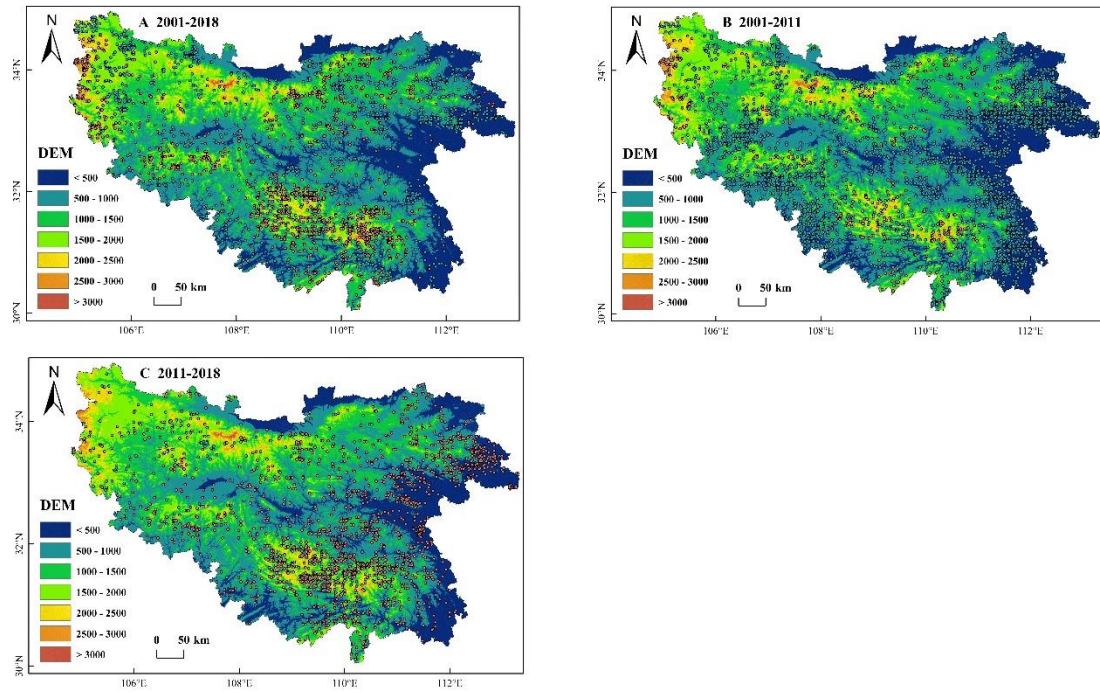

**Fig. S2.** Temporal trends in SOS passing significance tests ( $P < 0.05$ ). The red and blue dots indicate significantly advanced and delay , respectively.

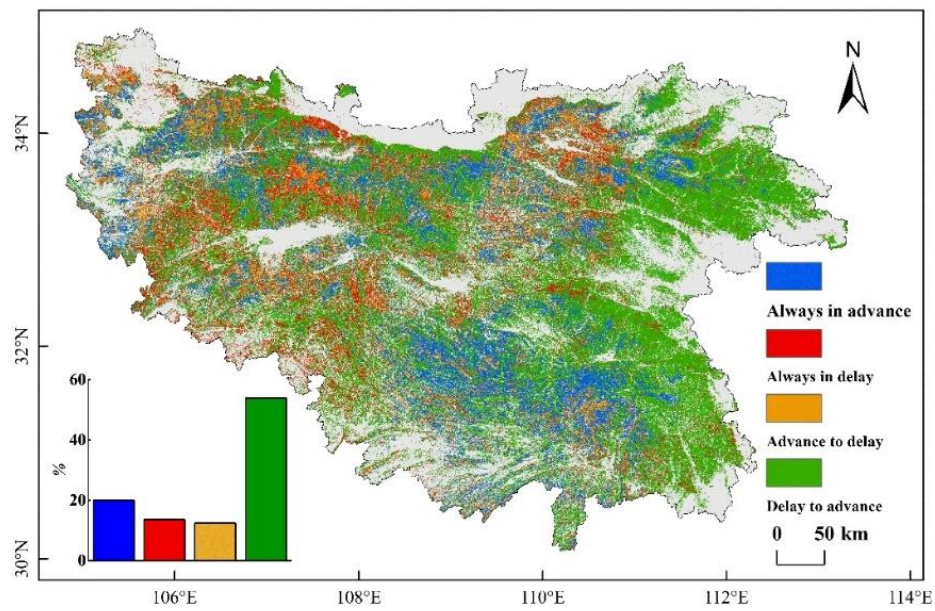

**Fig. S3.** Changes in temporal trends in SOS after 2011.

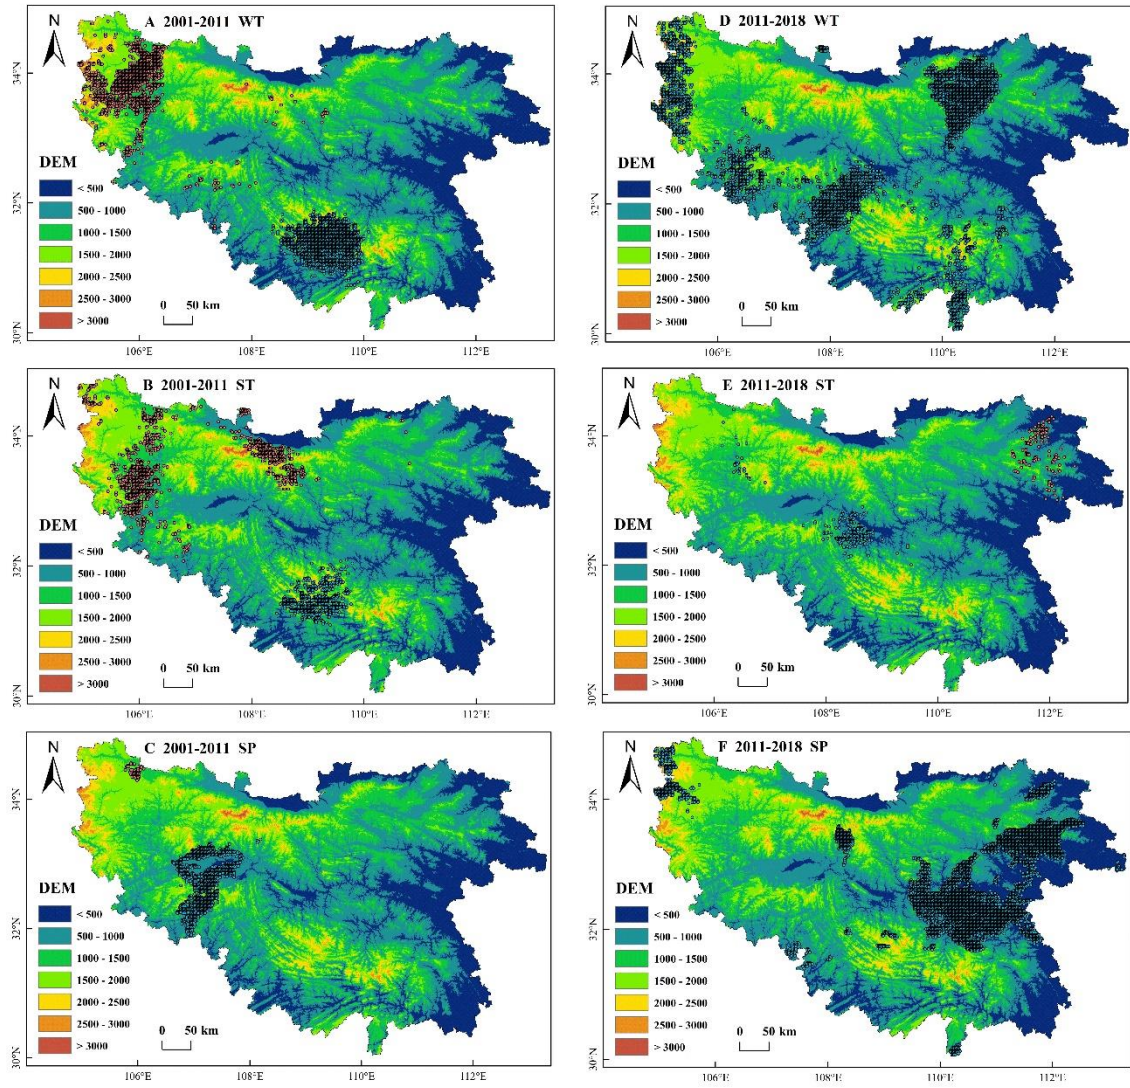

**Fig. S4.** Temporal trends in WT、ST and SP passing significance tests ( $P < 0.05$ ). The red and blue dots indicate significantly decreased and increased , respectively.

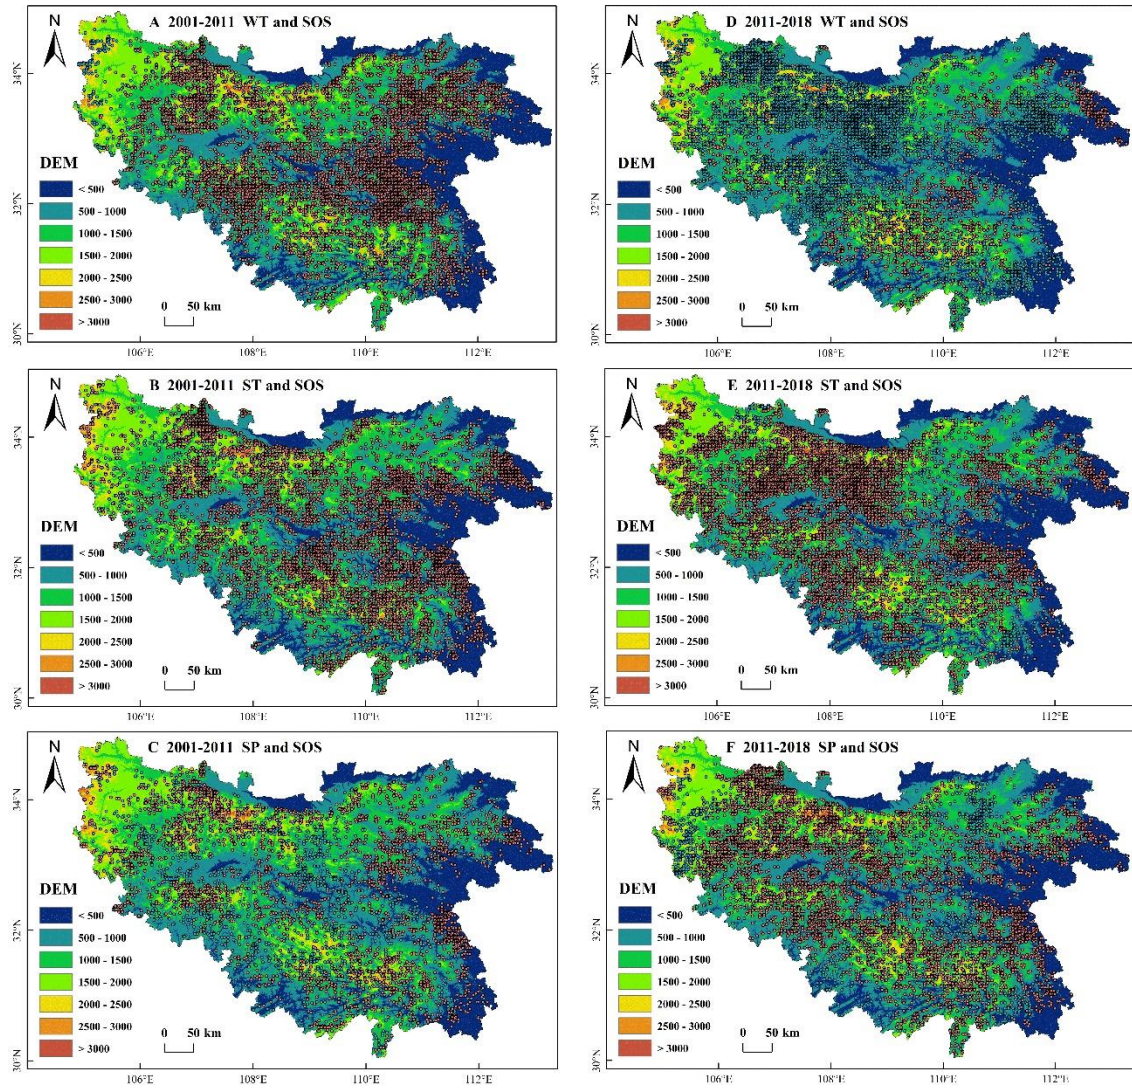

**Fig. S5.** Partial correlation coefficient between WT、ST and SP and SOS passing significance tests ( $P < 0.05$ ). The red and blue dots indicate significantly negative and positive correlations , respectively.

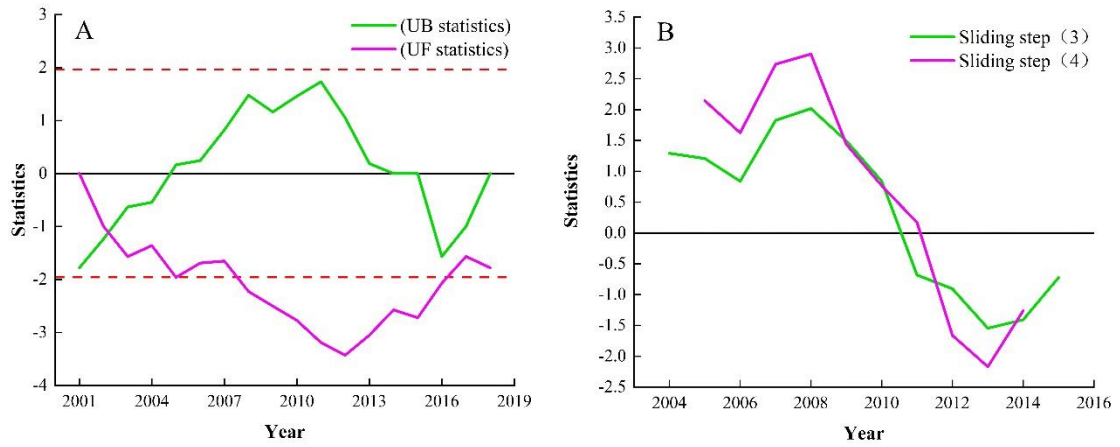

**Fig. S6.** Abrupt point test for slope of SOS along EG. A and B are based on the MK test and the sliding t-test. , respectively.
